# Supplementary material for: UV-light-enhanced room temperature NO2 gas-sensing performances based on sulfur-doped graphitic carbon nitride nanoflakes
Source: Royal Society of Chemistry journal article supplement (doi:10.1039/d2nj04117k), 2022-01-01
Supplement: d2nj04117k1.pdf [file d2nj04117k1.pdf]

## UV Light Enhanced Room Temperature NO<sub>2</sub> Gas Sensing Performances Based on Sulfur-doped Graphitic Carbon Nitride Nanoflakes

*Praveen Kumar Basivi,<sup>a</sup> Kedhareswara Sairam Pasupuleti,<sup>bc</sup> G. Devarajulu,<sup>b</sup> Moon-Deock Kim,<sup>b,c</sup> Visweswara Rao Pasupuleti,<sup>d</sup> Chang Woo Kim<sup>e,\*</sup>*

<sup>a</sup> Pukyong National University Industry-University Cooperation Foundation, Pukyong National University, Busan, 48513, Republic of Korea.

<sup>b</sup> Department of Physics, Chungnam National University, 99 Daehak-ro, Yuseong-gu, Daejeon 34134, Republic of Korea

<sup>c</sup> Institute of Quantum Systems (IQS), Chungnam National University, 99 Daehak-ro, Yuseong-gu, Daejeon, 34134, Republic of Korea

<sup>d</sup> International Relations and Research Collaborations, Reva University, Rukmini Knowledge Park, Kattigenahalli, Yelahanka, Bangalore, Karnataka - 560064, India.

<sup>e</sup> Department of Nanotechnology Engineering, College of Engineering, Pukyong National University, Busan, 48513, Republic of Korea.

Correspondence: kimcw@pknu.ac.kr

The 2D nanomaterials area has been expanded immeasurably since the invention of graphene. Most of the researchers have explored several compulsive physical phenomena when the dimension of materials mutates from 3D to 2D. The electrifying properties of 2D nanomaterials include good flexibility, excellent mechanical strength, quantum confinement, and high transparency, that make them acceptable for wide industrial applications. Monolayer and few-layered nanomaterials exhibit some rousing physics because of the quantum confinement effect than typical bulk materials. Very interestingly, a small alteration in the atomic layers of 2D nanomaterials will result in a change in its physiochemical properties that further enriches the optical absorption capabilities. Therefore, it is crucial to control the extension parameters of 2D nanomaterials for their specific applications. Nonetheless, their sustainability and low mass production control their applications, however these bottle necks can be avoided by utilizing some modified synthesis techniques. The improvement in the synthesis and device fabrication of 2D  $g\text{-C}_3\text{N}_4$  has been extensively prospect due to its excellent optoelectronics and nanoelectronics application over the last two decades. Furthermore, the abnormal properties of  $g\text{-C}_3\text{N}_4$  make it an appropriate candidate as a gas sensor for the effective detection of toxic, hazardous and flammable gases. Graphitic carbon nitride (GCN) comprise of crystalline bonds of nitrogen and carbon atoms with seven phases. Amidst all phases, graphitic carbonitride ( $g\text{-C}_3\text{N}_4$ ) is the popular stable phase of CN under atmospheric ambiances, due to their excellent chemical and thermal stability, that further enables the acceptance of doping agents into the crystal lattice without any degradation of structural moieties. Moreover, the functional groups such as, lone pair of electrons, amine, hydroxyl, C-N and N-H bond presents in the GCN network would substantially enhances the gas absorption capability and improve the gas sensing characteristics.

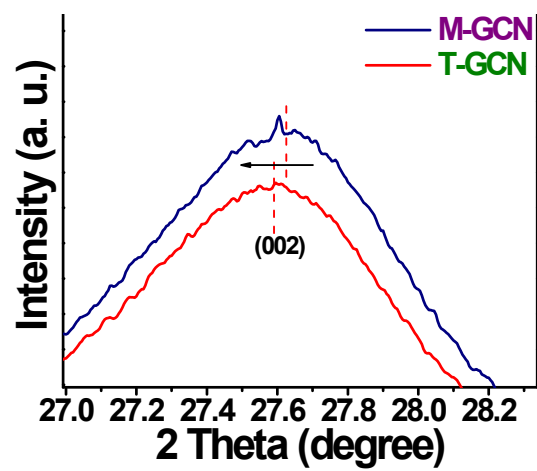

**Fig. S1** The enlarged XRD pattern of M-GCN (blue) and T-GCN (red).

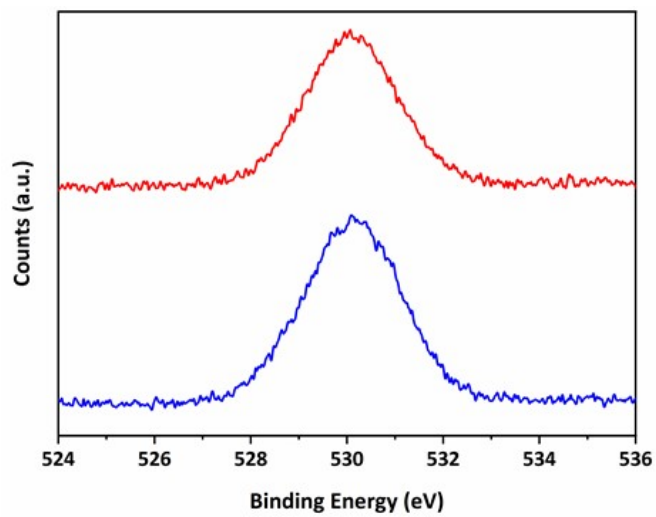

**Fig. S2** The core level of O 1s in M-GCN (blue) and T-GCN (red).

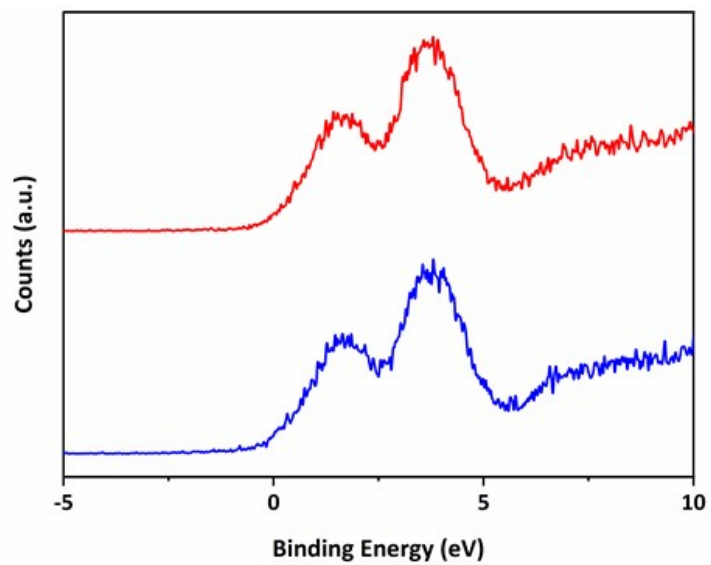

**Fig. S3** XPS valence band offset of M-GCN (blue) and T-GCN (red).

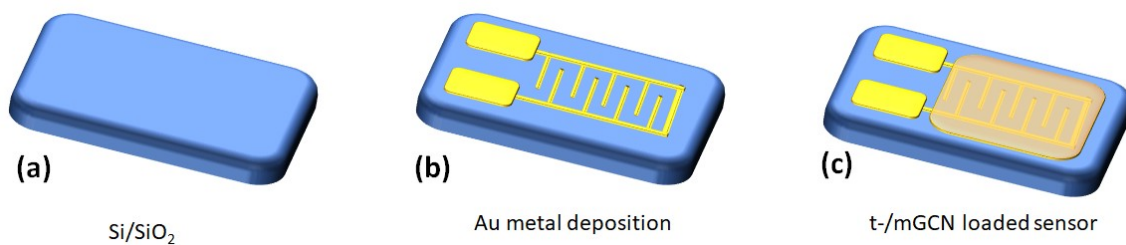

**Fig. S4** Schematic illustration of the fabrication of GCN based sensor for NO<sub>2</sub> gas sensing application.

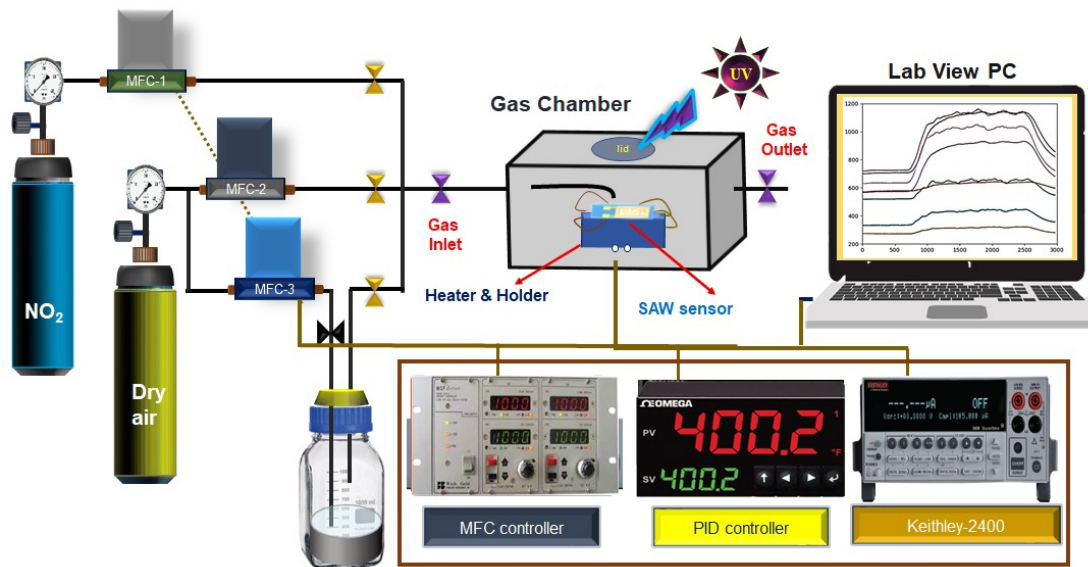

**Fig. S5** Schematic illustration of the fabrication of M-GCN/T-GCN resistive based sensor for NO<sub>2</sub> gas sensing application, (d) experimental gas sensing system setup.
